# Supplementary material for: Genome-Wide Expression Profiling of Genes Associated with the Lr47-Mediated Wheat Resistance to Leaf Rust (Puccinia triticina)
Source: MDPI journal article supplement (doi:10.3390/ijms20184498), 2019-09-11
Supplement: s1 [file s1]

**Supplementary Table S1.** Sequencing information of the samples in the current RNA-seq assay.

| Sample name | Raw reads | Clean reads | Clean bases | Error rate(%) | Q20(%) | Q30(%) | GC content(%) |
|-------------|-----------|-------------|-------------|---------------|--------|--------|---------------|
| R47_CK_1    | 139867242 | 134511230   | 20.18G      | 0.02          | 96.93  | 92.27  | 56.72         |
| R47_CK_2    | 122071112 | 117533988   | 17.63G      | 0.02          | 96.98  | 92.39  | 56.42         |
| R47_CK_3    | 90972864  | 87609364    | 13.14G      | 0.02          | 96.85  | 92.13  | 56.45         |
| R47_PT_1    | 111161172 | 106871764   | 16.03G      | 0.02          | 96.97  | 92.35  | 56.87         |
| R47_PT_2    | 94684754  | 91438232    | 13.72G      | 0.02          | 96.97  | 92.36  | 57.23         |
| R47_PT_3    | 100430446 | 96508140    | 14.48G      | 0.02          | 96.94  | 92.32  | 57.53         |
| R47_1037_1  | 105619412 | 105619412   | 15.84G      | 0.02          | 97.06  | 92.54  | 56.86         |
| R47_1037_2  | 113428678 | 112161374   | 16.82G      | 0.03          | 96.85  | 91.77  | 55.45         |
| R47_1037_3  | 120811660 | 119578618   | 17.94G      | 0.03          | 96.41  | 90.78  | 55.86         |
| R47_WY_1    | 110602272 | 110602272   | 16.59G      | 0.02          | 97.02  | 92.47  | 56.53         |
| R47_WY_2    | 116745456 | 115465052   | 17.32G      | 0.03          | 96.58  | 91.16  | 55.63         |
| R47_WY_3    | 123319988 | 122008174   | 18.3G       | 0.03          | 97.00  | 92.03  | 54.91         |

R47\_CK: Seedlings of wheat line *Lr47*-Yecora Rojo-BC<sub>6</sub>F<sub>5</sub> inoculated with sterile water.

R47\_PT: Seedlings of wheat line *Lr47*-Yecora Rojo-BC<sub>6</sub>F<sub>5</sub> inoculated with *Pt* pathotype THTT.

R47\_1037: Seedlings of wheat line *Lr47*-UC1037 inoculated with *Pt* pathotype THTT.

R47\_WY: Seedlings of wheat line *Lr47*-White Yecora inoculated with *Pt* pathotype THTT.

**Supplementary Table S2.** Assembly information of the samples in the current RNA-seq assay.

| Sample name             | R47_CK_1  | R47_CK_2  | R47_CK_3 | R47_PT_1  | R47_PT_2 | R47_PT_3 | R47_1037_1 | R47_1037_2 | R47_1037_3 | R47_WY_1  | R47_WY_2  | R47_WY_3  |
|-------------------------|-----------|-----------|----------|-----------|----------|----------|------------|------------|------------|-----------|-----------|-----------|
| <b>Total reads</b>      | 134511230 | 117533988 | 87609364 | 106871764 | 91438232 | 96508140 | 105619412  | 112161374  | 119578618  | 110602272 | 115465052 | 122008174 |
| <b>Total mapped</b>     | 92.90%    | 92.97%    | 92.92%   | 92.72%    | 93.02%   | 92.56%   | 92.89%     | 93.14%     | 92.96%     | 92.82%    | 93%       | 92.05%    |
| <b>Multiple mapped</b>  | 3.94%     | 3.98%     | 3.94%    | 4.09%     | 4.14%    | 3.91%    | 4.10%      | 3.51%      | 3.25%      | 4.16%     | 3.56%     | 2.98%     |
| <b>Uniquely mapped</b>  | 88.96%    | 89%       | 88.98%   | 88.63%    | 88.88%   | 88.65%   | 88.79%     | 89.63%     | 89.71%     | 88.66%    | 89.45%    | 89.07%    |
| <b>Read-1</b>           | 44.79%    | 44.80%    | 44.83%   | 44.61%    | 44.75%   | 44.64%   | 44.67%     | 44.92%     | 45.23%     | 44.64%    | 44.99%    | 44.65%    |
| <b>Read-2</b>           | 44.17%    | 44.20%    | 44.15%   | 44.02%    | 44.13%   | 44.01%   | 44.12%     | 44.71%     | 44.48%     | 44.02%    | 44.46%    | 44.42%    |
| <b>Reads map to '+'</b> | 44.38%    | 44.40%    | 44.39%   | 44.22%    | 44.35%   | 44.23%   | 44.30%     | 44.77%     | 44.79%     | 44.23%    | 44.66%    | 44.48%    |
| <b>Reads map to '-'</b> | 44.57%    | 44.60%    | 44.59%   | 44.41%    | 44.54%   | 44.42%   | 44.49%     | 44.86%     | 44.91%     | 44.43%    | 44.79%    | 44.59%    |
| <b>Non-splice reads</b> | 57.94%    | 57.93%    | 57.22%   | 58.01%    | 57.90%   | 58.61%   | 58.75%     | 56.70%     | 58.34%     | 58.46%    | 56.88%    | 59.71%    |
| <b>Splice reads</b>     | 31.02%    | 31.07%    | 31.76%   | 30.62%    | 30.99%   | 30.04%   | 30.03%     | 32.93%     | 31.36%     | 30.20%    | 32.57%    | 29.36%    |

R47\_CK: Seedlings of wheat line *Lr47*-Yecora Rojo-BC6F5 inoculated with sterile water.

R47\_PT: Seedlings of wheat line *Lr47*-Yecora Rojo-BC6F5 inoculated with *Pt* pathotype THTT.

R47\_1037: Seedlings of wheat line *Lr47*-UC1037 inoculated with *Pt* pathotype THTT.

R47\_WY: Seedlings of wheat line *Lr47*-White Yecora inoculated with *Pt* pathotype THTT.

**Supplementary Table S3.** Primers used in the current study.

| Primer name                | Sequence 5' to 3'         | Gene accession                         | PCR product | Amplification efficiency |
|----------------------------|---------------------------|----------------------------------------|-------------|--------------------------|
| LRR-RLK_AA1807990-qRT-F    | GACATTTTCGTCAAACAAGC      | TRIAE_CS42_7AS_TGACv1_569126_AA1807990 | 88 bp       | 99.0%                    |
| LRR-RLK_AA1807990-qRT-R    | AAGCATACCAAGACCACC        |                                        |             |                          |
| LRR-RLK_AA1807960-qRT-F    | TAGGTGGGACGCTGGAGT        | TRIAE_CS42_7AS_TGACv1_569126_AA1807960 | 150 bp      | 112.0%                   |
| LRR-RLK_AA1807960-qRT-R    | TTATCTGGTTGCCTTGCA        |                                        |             |                          |
| RPM1_AA1836940-qRT-F       | GACATACATGAGGTGCCTAG      | TRIAE_CS42_7AS_TGACv1_570514_AA1836940 | 84 bp       | 104.0%                   |
| RPM1_AA1836940-qRT-R       | GAGTCCCTTCACATTCCA        |                                        |             |                          |
| LRR-RLK_AA1822740-qRT-F    | GGTTTGGGCTCAAGGATA        | TRIAE_CS42_7AS_TGACv1_569722_AA1822740 | 81 bp       | 112.0%                   |
| LRR-RLK_AA1822740-qRT-R    | AGGACATTGCGTGGTTTC        |                                        |             |                          |
| WAK2_AA1839280-qRT-F       | TGGCCCGGTGACCACAAA        | TRIAE_CS42_7AS_TGACv1_570678_AA1839280 | 155 bp      | 95.9%                    |
| WAK2_AA1839280-qRT-R       | AGAACGACACGCAGCCTCCC      |                                        |             |                          |
| L-type RLK_AA1946750-qRT-F | CGTCGGTGGCACCCTTACA       | TRIAE_CS42_7BS_TGACv1_592960_AA1946750 | 199 bp      | 92.2%                    |
| L-type RLK_AA1946750-qRT-R | CACTGAACTTGGCTGACCAGATAGA |                                        |             |                          |
| ZmPK1_AA1953360-qRT-F      | CAACCTTGTCGTCGTGGAT       | TRIAE_CS42_7BS_TGACv1_593644_AA1953360 | 294 bp      | 98.0%                    |
| ZmPK1_AA1953360-qRT-R      | TGTTGAAGAACAGCATAGCG      |                                        |             |                          |
| LRR-RLK_AA2043410-qRT-F    | AGCAAGCATCCCAGAATC        | TRIAE_CS42_7DS_TGACv1_622658_AA2043410 | 86 bp       | 100.9%                   |
| LRR-RLK_AA2043410-qRT-R    | TCATGGTAGTCAAGTCGGTTA     |                                        |             |                          |
| TaPR1a-qRT-F               | GCGGTGAAGCTGTGGGTGGA      | FJ815169                               | 180 bp      | 94.4%                    |
| TaPR1a-qRT-R               | GGGCTCGTAGTTGCAGGTGATGA   |                                        |             |                          |
| TaActin-qRT-F              | ACCTTCAGTTGCCCAGCAAT      | AB181991                               | 91 bp       | 102.6%                   |
| TaActin-qRT-R              | CAGAGTCGAGCACAATACCAGTTG  |                                        |             |                          |
